# Supplementary material for: Visualizing conformation transitions of the Lipid II flippase MurJ
Source: PubMed Central journal article supplement (PMC6465408; doi:10.1038/s41467-019-09658-0), 2019-04-15
Supplement: 41467_2019_9658_MOESM1_ESM.pdf [file 41467_2019_9658_MOESM1_ESM.pdf]

## **Supplementary Information**

### **Visualizing Conformation Transitions of the Lipid II Flippase MurJ**

**Kuk et al.**

12 Supplementary figures

4 Supplementary tables

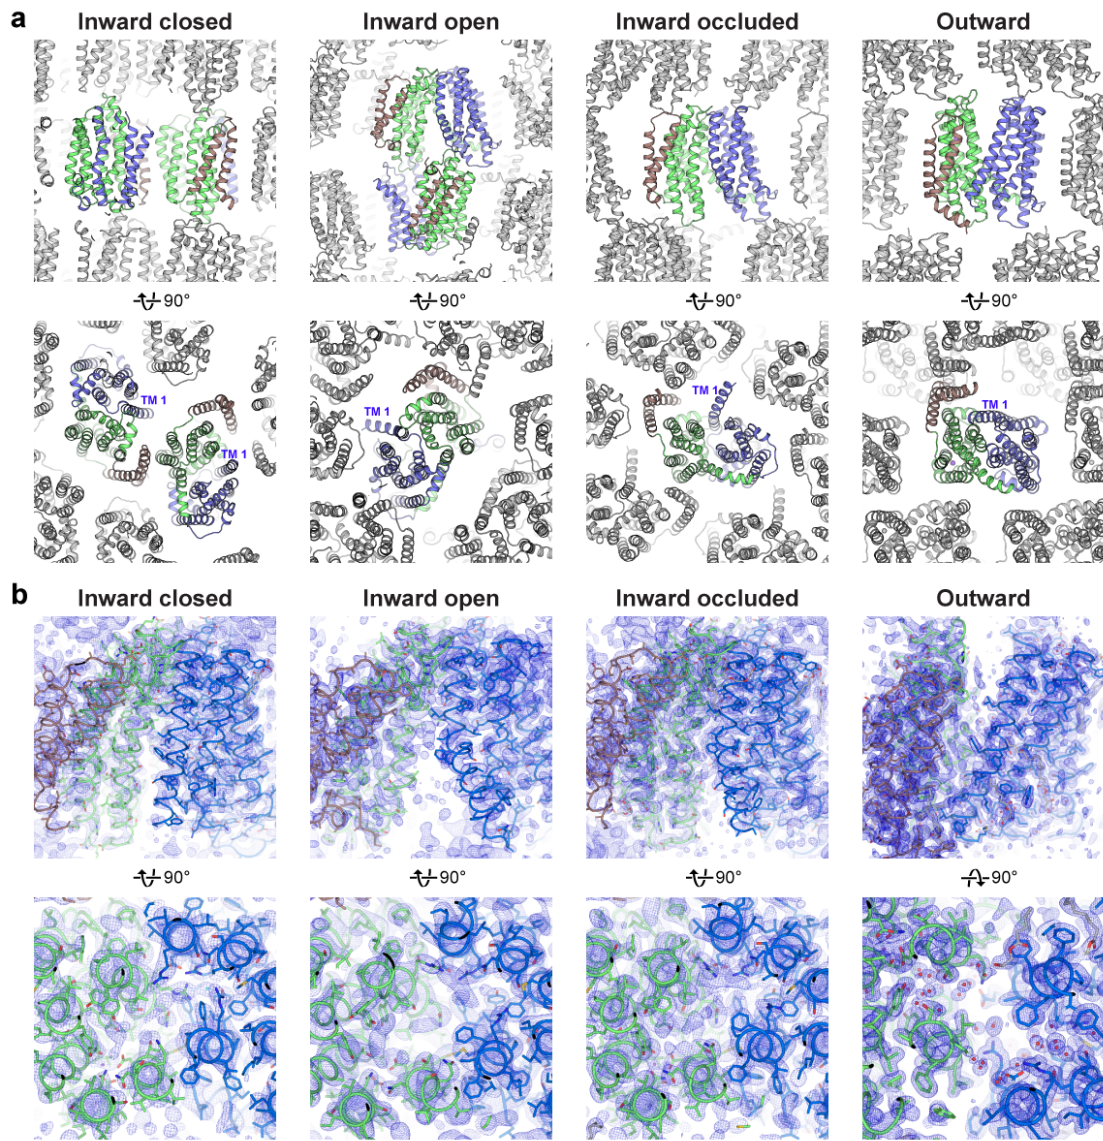

**Supplementary Figure 1. Crystal packing and electron density in the MurJ<sub>TA</sub> structures. a.**

Crystals were obtained in lipidic cubic phase doped with Lipid II. Crystal contacts are mostly formed by end-to-end stacking, as well as lateral interactions mediated by the host lipid monoolein. TM 1 was not involved in crystal packing and thus its bending is unlikely to be a crystallographic artifact. The asymmetric unit is colored, while symmetry mates are shown in gray.

**b.** 2Fo – Fc composite omit electron density maps (contoured to 1  $\sigma$ ), omitting 5% of the model at a time. Resolutions are (from left) 3.2 Å, 3.0 Å, 2.6 Å, and 1.8 Å.



**Supplementary Figure 2. Alignment of MurJ sequences.** Positions shaded in red are identical in >90% of Gram-negative MurJ sequences in an alignment with 36 sequences, while those shaded gray are similar in >70% of the sequences. Asterisks (\*) denote essential residues in MurJ<sub>TA</sub> of which alanine mutants fail to complement *E. coli* MurJ, as determined previously<sup>25</sup>. Carets (^) denote residues participating in Na<sup>+</sup> coordination. Bullets (•) denote other residues discussed in this manuscript. MurJ<sub>TA</sub> from *Thermosipho africanus* (UniProt ID: B7IE18) was aligned with 36 Gram-negative MurJ sequences from the UniRef50 library (no sequence is more than 50% identical to another). Drug exporters PfMATE and NorM-NG were also included in the alignment for contrast.

List of sequences shown: MurJ-TA, *Thermosipho africanus* (UniProt ID: B7IE18); MurJ-EC, *Escherichia coli* (P0AF16); MurJ-PF, *Pseudomonas fluorescens* (G8PWV6); MurJ-VC, *Vibrio cholerae* (O34238); MurJ-LI, *Leptospira interrogans* (A0A0C5X9A5); MurJ-RS, *Rhodobacter sphaeroides* (Q3J5H7); PfMATE (PDB ID: 3VVN); NorM-NG (4HUK).

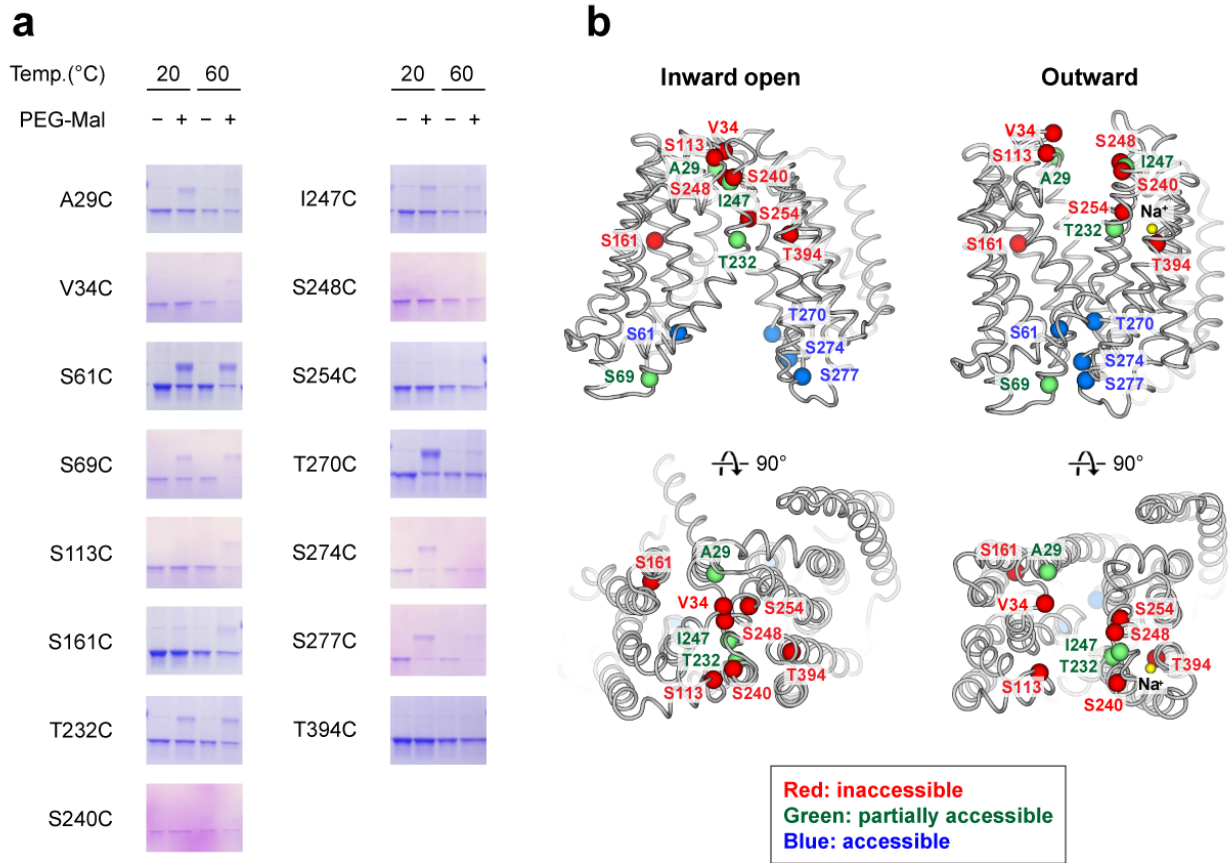

**Supplementary Figure 3. MurJ<sub>TA</sub> assumes a predominantly inward-facing conformation in DDM micelles.** **a**, Single cysteine mutants of MurJ<sub>TA</sub> (no endogenous cysteines) were expressed, purified, delipidated, and probed for accessibility in DDM micelles by a direct labeling strategy in potassium acetate (absence of sodium). Accessible cysteines would be labeled by PEG5000-maleimide (PEG-Mal), resulting in a mass shift up the gel. Experiments were performed at either 20°C or 60°C. Source data are provided as a Source Data File. **b**, Mapping of these cysteine positions (for the 20°C data) to the inward-open and outward-facing crystal structures of MurJ<sub>TA</sub>. Positions were considered inaccessible if only the lower band was observed, and accessible if the top band was observed and of higher intensity than the lower band. Remaining positions with both bands visible were considered partially accessible.

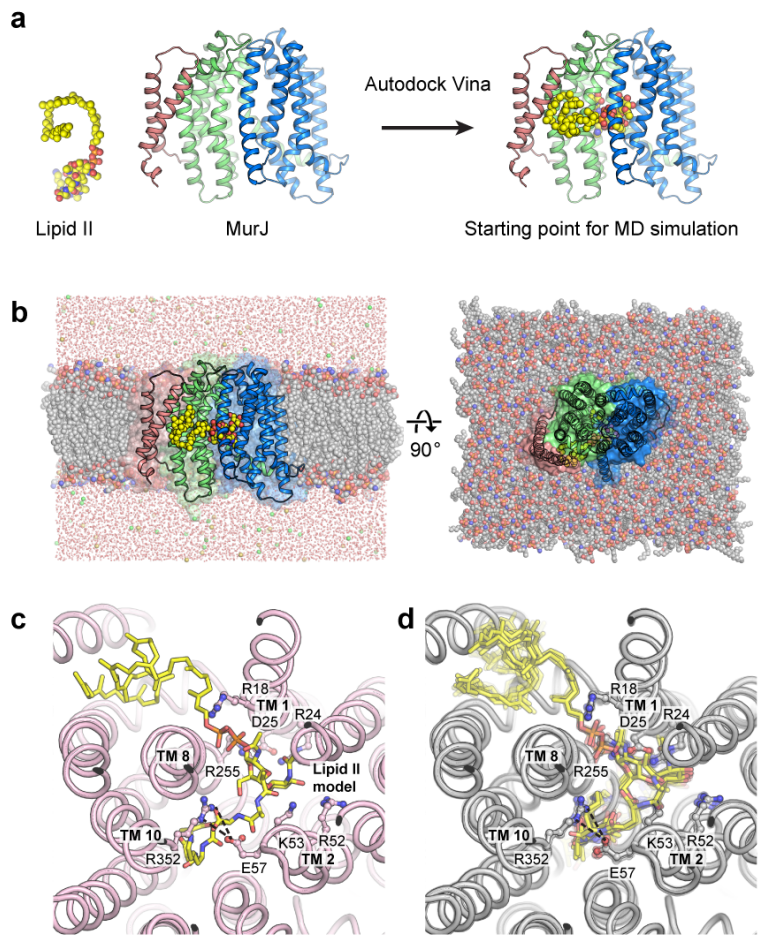

**Supplementary Figure 4. Docking and MD simulation of Lipid II to the inward-occluded structure.** **a**, Lipid II (yellow spheres) was docked to the inward-occluded structure by Autodock Vina. **b**, The docking result was used as a starting point for molecular dynamics simulation by NAMD in a hydrated and ionized (150 mM NaCl) POPE membrane bilayer system. The equilibrated system is shown, with lipids visualized as spheres and waters denoted by red dots. **c**, Cytoplasmic view of the docked complex (Lipid II shown as yellow sticks, charged residues in the cavity shown as gray sticks), showing how the Glu57-Arg352 thin gate could help occlude the substrate. **d**, Rotation of MurJ sidechain and Lipid II torsions in a molecular dynamics simulation starting from the docked model, visualizing the picosecond dynamics of the docked MurJ-Lipid II complex (snapshots at each 10 ps overlaid, total 100 ps). Surrounding lipids and waters are hidden for clarity.

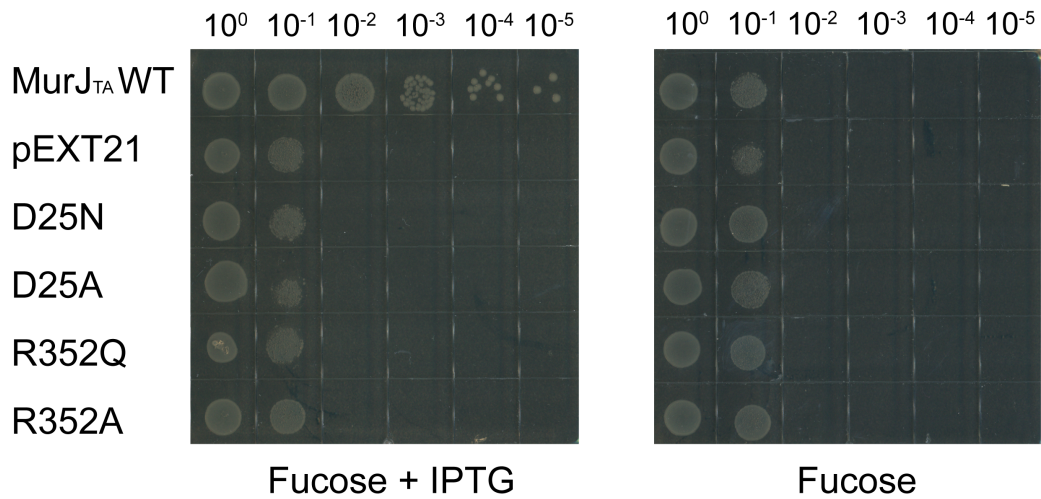

**Supplementary Figure 5. Complementation assay of MurJ<sub>TA</sub> Asp25 and Arg352 mutants in *E. coli* NR1154.** Cells transformed with plasmids encoding MurJ<sub>TA</sub> (wild-type or mutant) or without insert (pEXT21) were depleted of endogenous *E. coli* MurJ by serial dilution on plates containing the anti-inducer D-fucose. MurJ<sub>TA</sub> expression was induced by addition of IPTG. Data shown are representative of three biological replicates. Source data are provided as a Source Data File.

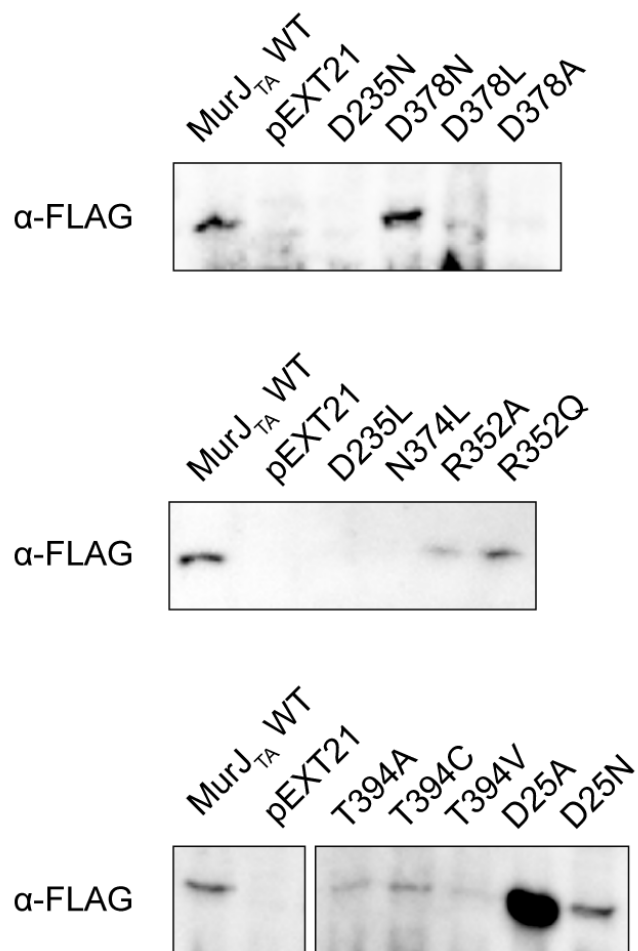

**Supplementary Figure 6. Western blot analysis of MurJ<sub>TA</sub> mutants.** MurJ<sub>TA</sub> proteins carrying a C-terminal FLAG tag were expressed by the addition of 0.1 mM IPTG in the presence of arabinose. Total membrane fractions were isolated by ultracentrifugation and probed by mouse anti-FLAG primary antibody and horseradish peroxidase-conjugated anti-mouse secondary antibody. Source data are provided as a Source Data File.



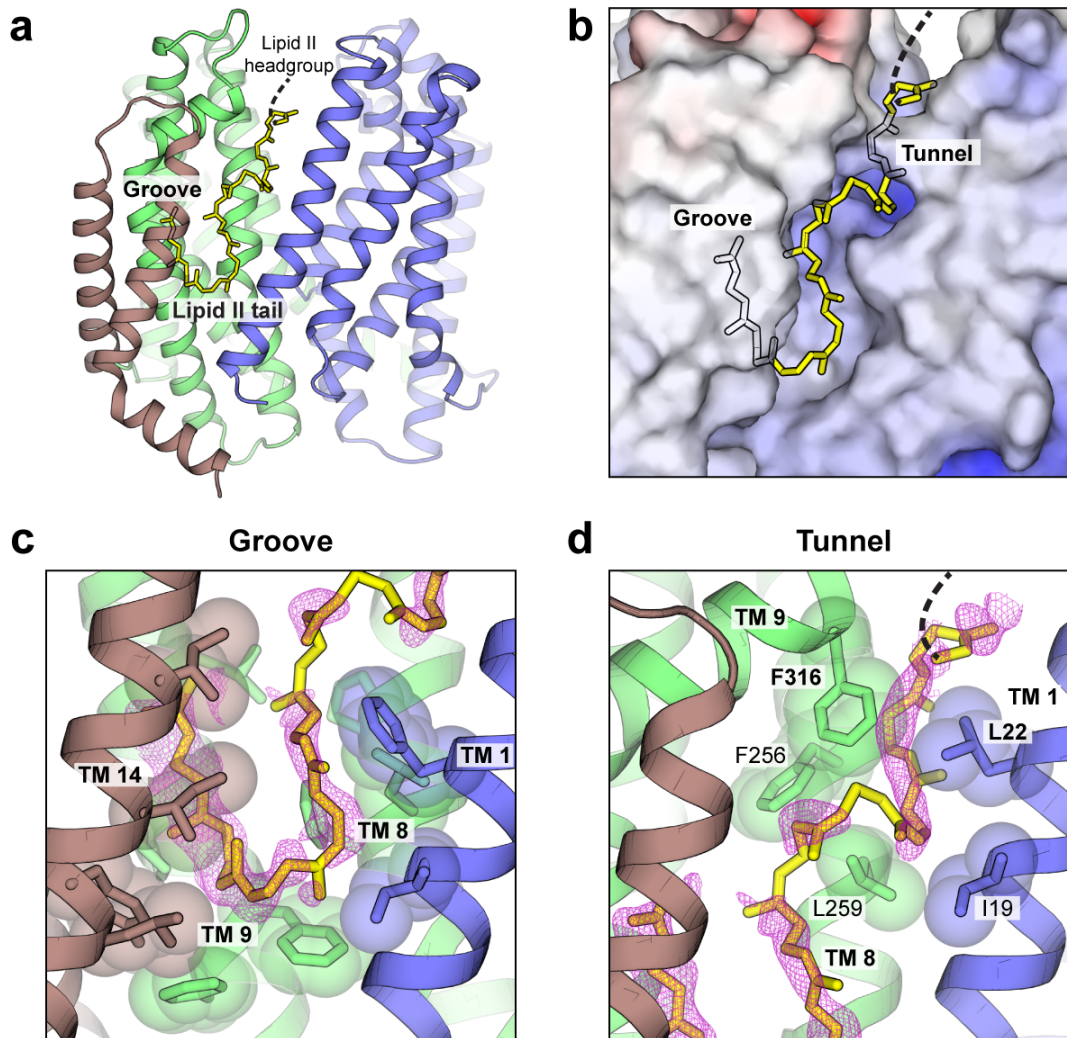

**Supplementary Figure 7. Structural features of the putative lipid-binding site in the outward state.** **a**, Putative lipid-binding site. Yellow sticks denote a model of the undecaprenyl tail of Lipid II, which was never used for structure refinement or map calculation. **b**, The lipid is restrained by the hydrophobic groove and a short tunnel near the periplasmic side. **c-d**, Unmodeled  $2F_o - F_c$  electron density peaks (purple mesh, contoured to  $0.7 \sigma$ ) were observed in the hydrophobic groove (c), or in the tunnel (d) which is formed by hydrophobic residues Ile19, Leu22, Phe256, Leu259, and Phe316.

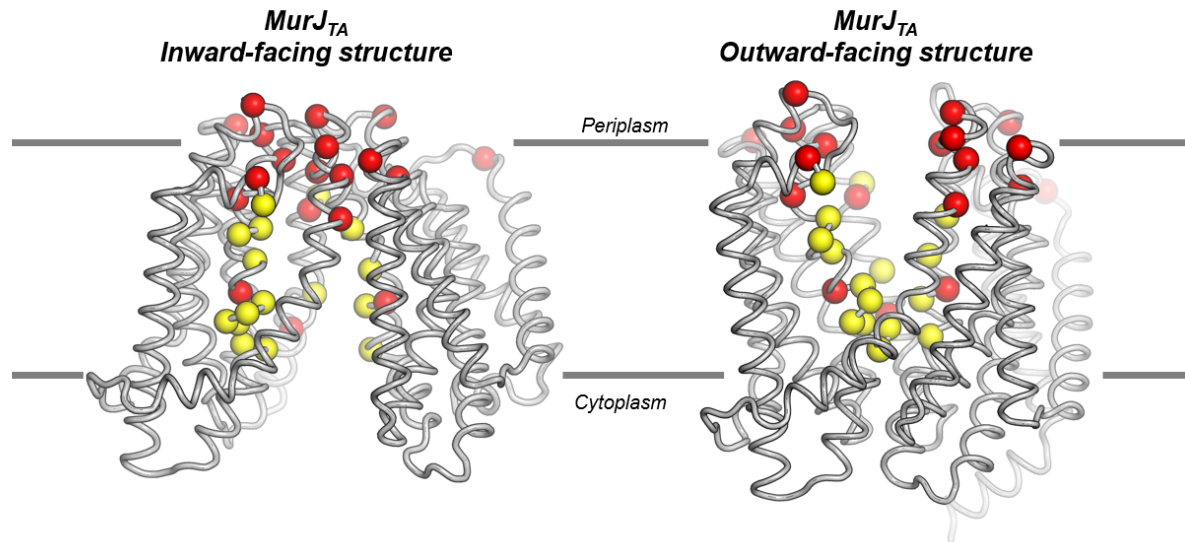

**Supplementary Figure 8. Mapping of MurJ<sub>EC</sub> cysteine accessibility data (Butler *et al*, 2013) to MurJ<sub>TA</sub> structures.** Positions accessible to the membrane impermeant reagent MTSES are shown as red spheres, while positions that are partially accessible are shown as yellow spheres. The structures of MurJ<sub>TA</sub> are consistent with the cysteine accessibility data suggesting a central cavity that is accessible to the periplasm (in the outward-facing conformation).

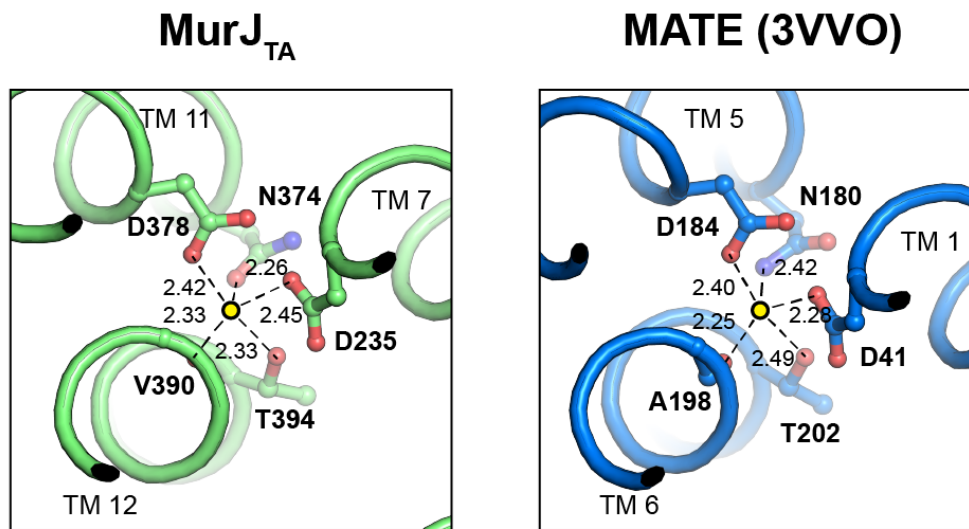

**Supplementary Figure 9. The Na<sup>+</sup> site of MurJ<sub>TA</sub> is conserved with that of Na<sup>+</sup> coupled MATE transporters in the same superfamily.** MurJ<sub>TA</sub> is shown on the left, while *Pyrococcus furiosus* MATE (PfMATE) is shown on the right (PDB ID: 3VVO, Tanaka *et al.*, 2013; Ficici *et al.*, 2018), both with a DNDXT composition where X is a backbone carbonyl oxygen.

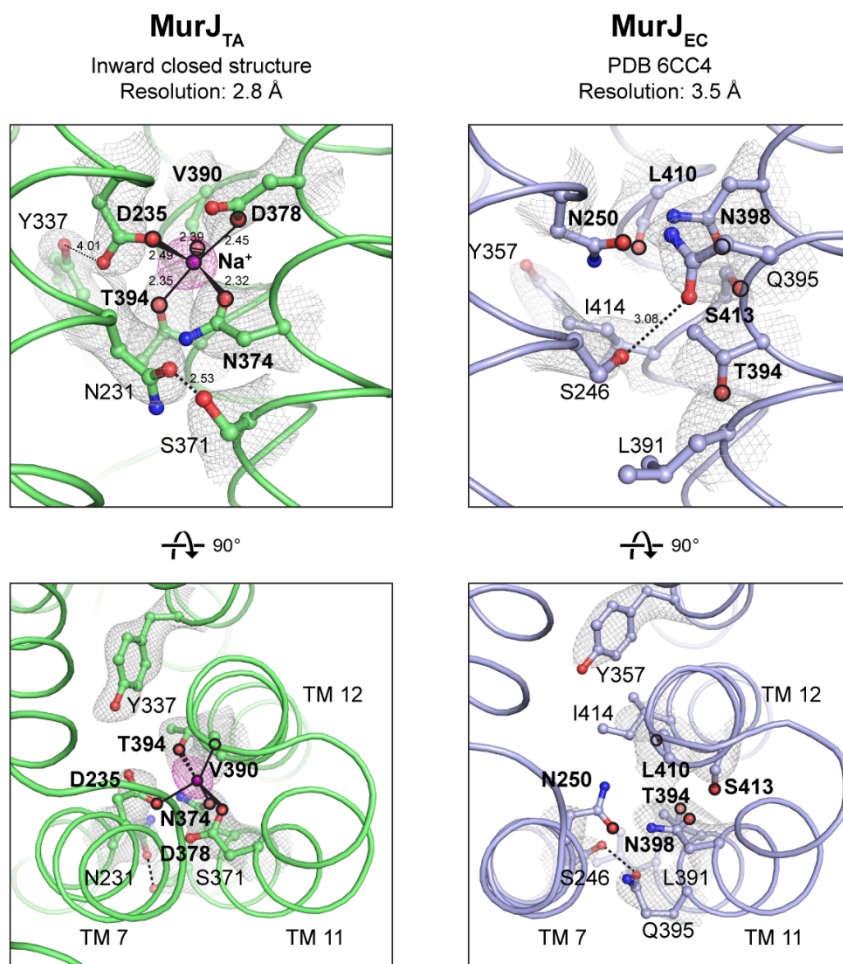

**Supplementary Figure 10. The Na<sup>+</sup> site of MurJ<sub>TA</sub> is similar with that of MurJ<sub>EC</sub>.** MurJ<sub>TA</sub> is shown on the left, while MurJ<sub>EC</sub> is shown on the right (PDB ID: 6CC4, Zheng *et al.*, 2017). The putative sodium-coordinating oxygen atoms (black circles) are conserved.

**a MurJ Complementation Growth Curve**

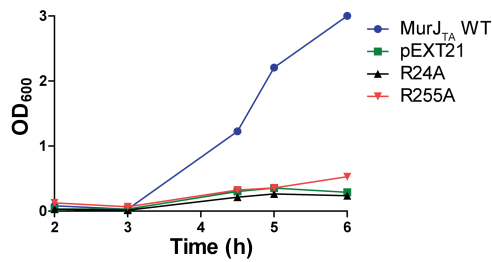

**b Lipid II Accumulation (Normalization to Lipid X)**

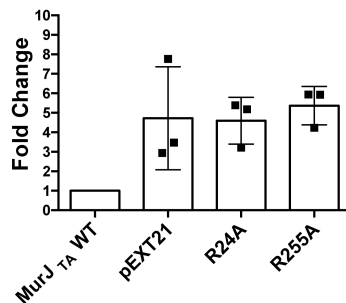

**Lipid II Accumulation (Normalization to PE)**

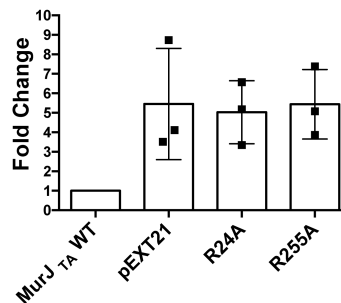

**Lipid II Accumulation (Normalization to OD<sub>600</sub>)**

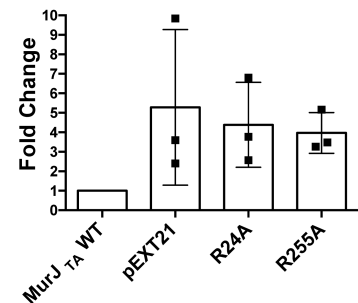

**Supplementary Figure 11. Mass spectrometry assay of cellular Lipid II accumulation. a,** Growth curve of *E. coli* MurJ-depletion strain NR1154 expressing MurJ<sub>TA</sub> wild-type (WT), mutants (R24A/R255A), or empty vector (pEXT21). Cultures were supplemented with D-fucose to deplete endogenous *E. coli* MurJ. At 3 hours post-inoculation, MurJ<sub>TA</sub> expression was induced with IPTG, and growth was monitored by optical density (OD<sub>600</sub>). **b,** At 6 hours post-inoculation, cells were harvested and cellular Lipid II levels were analyzed by mass spectrometry. Cellular Lipid II levels were normalized against either Lipid X, phosphatidylethanolamine (PE), or cell density (OD<sub>600</sub>). Lipid X is an intermediate in lipopolysaccharide biosynthesis pathway that is separate from the peptidoglycan synthesis pathway, but has similar chemical properties as Lipid II. Normalized Lipid II level of each replicate was divided by that of the wild-type to obtain the fold change. Data are mean  $\pm$  s.d., n=3 biological replicates. Source data are provided as a Source Data File.

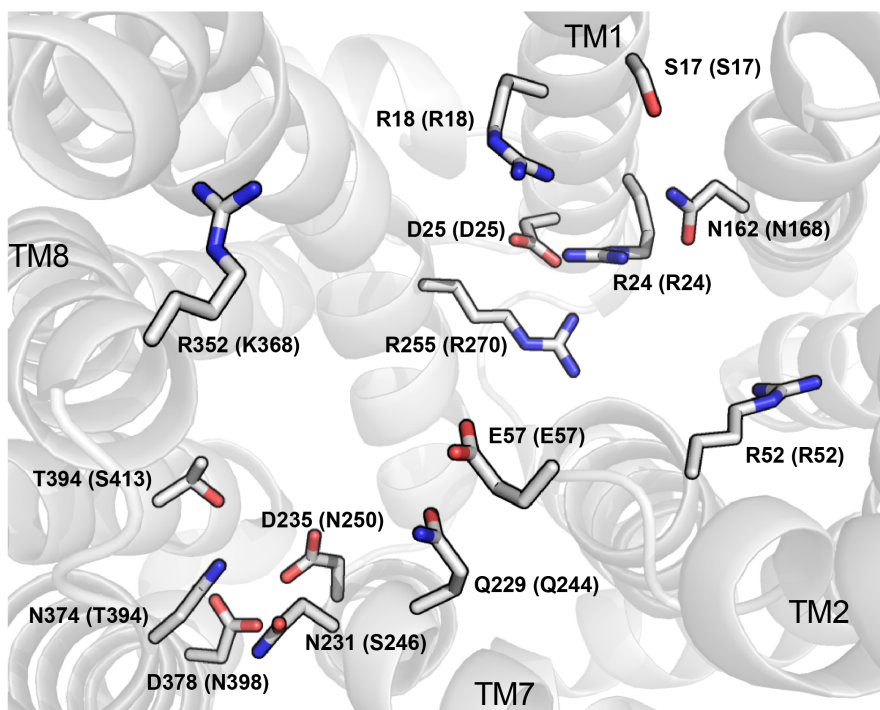

**Supplementary Figure 12. Charged and polar residues in the central cavity of MurJ<sub>TA</sub> that were subjected to mutagenesis studies.** Equivalent position in *E.coli* is in listed in parenthesis.

**Supplementary Table 1. Data collection and refinement statistics (molecular replacement)**

|                                                         | <b>Inward closed<sup>a</sup></b><br><b>(6NC6)</b> | <b>Inward open<sup>b</sup></b><br><b>(6NC7)</b> | <b>Inward occluded<sup>c</sup></b><br><b>(6NC8)</b> | <b>Outward<sup>d</sup></b><br><b>(6NC9)</b> |
|---------------------------------------------------------|---------------------------------------------------|-------------------------------------------------|-----------------------------------------------------|---------------------------------------------|
| <b>Data collection</b>                                  |                                                   |                                                 |                                                     |                                             |
| Space group                                             | P 2 2 2 <sub>1</sub>                              | C 2                                             | P 2 2 <sub>1</sub> 2 <sub>1</sub>                   | C 2                                         |
| Cell dimensions                                         |                                                   |                                                 |                                                     |                                             |
| a, b, c (Å)                                             | 71.1, 101.8, 158.5                                | 129.7, 105.5, 111.5                             | 68.4, 80.3, 100.7                                   | 128.6, 57.4, 86.4                           |
| α, β, γ (°)                                             | 90, 90, 90                                        | 90, 125.3, 90                                   | 90, 90, 90                                          | 90, 100.7, 90                               |
| Resolution (Å)                                          | 85.6–3.2 (3.3–3.2) <sup>e</sup>                   | 74.7–3.0 (3.1–3.0) <sup>e</sup>                 | 68.4–2.6 (2.7–2.6) <sup>e</sup>                     | 84.9–1.8 (1.9–1.8) <sup>e</sup>             |
| <i>R</i> <sub>pim</sub>                                 | 0.15 (0.94)                                       | 0.10 (0.83)                                     | 0.11 (>1.0)                                         | 0.076 (0.71)                                |
| <i>I</i> /σ( <i>I</i> )                                 | 9.48 (1.14)                                       | 11.41 (1.00)                                    | 13.29 (1.13)                                        | 22.71 (1.09)                                |
| Completeness (%)                                        | 99.4 (99.3)                                       | 99.0 (98.0)                                     | 99.8 (99.7)                                         | 99.9 (99.6)                                 |
| Redundancy                                              | 20.7 (21.3)                                       | 5.5 (5.1)                                       | 48.8 (38.3)                                         | 23.4 (23.5)                                 |
| <b>Refinement</b>                                       |                                                   |                                                 |                                                     |                                             |
| Resolution (Å)                                          | 85.6–3.2 (3.3–3.2) <sup>e</sup>                   | 74.7–3.0 (3.1–3.0) <sup>e</sup>                 | 68.4–2.6 (2.7–2.6) <sup>e</sup>                     | 84.9–1.8 (1.9–1.8) <sup>e</sup>             |
| No. reflections                                         | 17624 (1292)                                      | 20395 (1238)                                    | 17459 (1608)                                        | 51025 (3345)                                |
| <i>R</i> <sub>work</sub> / <i>R</i> <sub>free</sub> (%) | 25.5 / 28.0                                       | 25.4 / 27.8                                     | 22.9 / 25.8                                         | 17.9 / 19.9                                 |
| No. atoms                                               |                                                   |                                                 |                                                     |                                             |
| Protein                                                 | 7292                                              | 7241                                            | 3672                                                | 3775                                        |
| Ions/monoolein/PEG                                      | 27                                                | 126                                             | 125                                                 | 294                                         |
| Water                                                   | 0                                                 | 0                                               | 0                                                   | 156                                         |
| <i>B</i> factors (Å <sup>2</sup> )                      |                                                   |                                                 |                                                     |                                             |
| Protein                                                 | 31.18                                             | 46.54                                           | 48.19                                               | 20.55                                       |
| Ions/monoolein/PEG                                      | 32.77                                             | 45.10                                           | 58.48                                               | 48.24                                       |
| Water                                                   | N/A                                               | N/A                                             | N/A                                                 | 28.35                                       |
| R.m.s. deviations                                       |                                                   |                                                 |                                                     |                                             |
| Bond lengths (Å)                                        | 0.005                                             | 0.005                                           | 0.003                                               | 0.003                                       |
| Bond angles (°)                                         | 1.02                                              | 0.67                                            | 0.62                                                | 0.66                                        |

<sup>a</sup> Merged from 3 crystals.<sup>b</sup> Merged from 2 crystals.<sup>c</sup> Merged from 7 crystals (2 collected at wavelength of 0.98 Å and 5 at 1.65 Å).<sup>d</sup> Merged from 6 crystals.<sup>e</sup> Values in parentheses are for highest-resolution shell.

**Supplementary Table 2. Comparison of mutagenesis data for MurJ<sub>TA</sub> and MurJ<sub>EC</sub>**

| Residues in TA | Residues in EC | MurJ <sub>TA</sub>               |                           | MurJ <sub>EC</sub> |                  | Location |
|----------------|----------------|----------------------------------|---------------------------|--------------------|------------------|----------|
|                |                | Kuk et al., 2017, and this study | Butler et al., 2013, 2014 | Zheng et al., 2018 |                  |          |
| S17            | S17            | A                                |                           | L W                | P T A            | TM1      |
| R18            | R18            | A                                | A C E K                   | P                  | C S L G H        | TM1      |
| R24            | R24            | A                                | A C E K                   | G                  | L Q P            | TM1      |
| D25            | D25            | A N                              | C                         | H Y N              | G V A E          | TM1      |
| R52            | R52            | A                                | A C E K                   | C                  | S L P H          | TM2      |
| E57            | E57            | A                                | C                         | K                  | Q A V G D        | TM2      |
| N162           | N168           | A                                |                           | K*                 | I D H Y S T      | TM5      |
| Q229           | Q244           | A                                | C                         | L                  | E K P R H        | TM7      |
| N231           | S246           | A                                |                           | C                  | A P T F Y        | TM7      |
| D235           | N250           | A N L                            | C                         | K                  | D Y H T I S      | TM7      |
| R255           | R270           | A                                | A C E K                   | P                  | C S L H          | TM8      |
| R352           | K368           | A Q                              | C                         | E I                | Q T K N          | TM10     |
| N374           | T394           | A L                              |                           | R K                | P S A M          | TM11     |
| D378           | N398           | N L A                            |                           |                    | D H Y T S I<br>K | TM11     |
| T394           | S413           | C V A                            |                           | Y                  | A P T F C        | TM12     |

\*Nucleotide 504 C to G and to A mutations, although resulting in synonymous N168K mutation, one led to a fold change of 13 and the other 2. In this table, we choose 13 for categorization.

Table Legend:

| Kuk <i>et al.</i> , 2017 and this study, | Butler <i>et al.</i> , 2013 2014                | Zheng <i>et al.</i> , 2018          |
|------------------------------------------|-------------------------------------------------|-------------------------------------|
| No complementation                       | No complementation                              | Mutation frequency fold change >5   |
| Partial complementation                  | Complementation but sensitive to low osmolarity | Mutation frequency fold change >2.5 |
| Complementation                          | Complementation                                 | Mutation frequency fold change <2.5 |



**Supplementary Table 3. Sodium Fo – Fc omit peak heights and coordination distances**

| <b>Structure</b> | <b>Na<sup>+</sup> Fo – Fc<br/>omit peak<br/>height</b> | <b>Na<sup>+</sup> coordination distance (in Ångstrom)</b> |               |               |             |               |
|------------------|--------------------------------------------------------|-----------------------------------------------------------|---------------|---------------|-------------|---------------|
|                  |                                                        | Asp235<br>OD1                                             | Asn374<br>OD1 | Asp378<br>OD1 | Val390<br>O | Thr394<br>OG1 |
| Inward closed    | 7 sigma                                                | 2.49                                                      | 2.32          | 2.45          | 2.39        | 2.35          |
| Inward occluded  | 9 sigma                                                | 2.44                                                      | 2.43          | 2.40          | 2.40        | 2.41          |
| Outward          | 19 sigma                                               | 2.45                                                      | 2.26          | 2.42          | 2.33        | 2.33          |

**Supplementary Table 4. List of primers used in this study**

| <b>Primer name</b>            | <b>Sequence (5' to 3')</b>                         |
|-------------------------------|----------------------------------------------------|
| <b>Sodium site</b>            |                                                    |
| MurJ_D235L_F                  | agccagatcaaacactgtggtgctaataaacgtggtttctttctac     |
| MurJ_D235L_R                  | gtagaaagaaccacgttcattagcaccacagtggtgatctggct       |
| MurJ_D235N_F                  | cagatcaaacactgtggtgaacatgaacgtggtttctt             |
| MurJ_D235N_R                  | aagaaccacgttcattggtcaccacagtggtgatctg              |
| MurJ_D378A_F                  | gcctgagcaatatcattctggctattatctttggcctgaaata        |
| MurJ_D378A_R                  | tatttcaggccaaagataatagccagaatgatattgctcaggc        |
| MurJ_D378L_F                  | gtagcctgagcaatatcattctgctaattatctttggcctgaaatacggc |
| MurJ_D378L_R                  | gccgtatttcaggccaaagataatagcagaatgatattgctcaggctaac |
| MurJ_D378N_F                  | ttagcctgagcaatatcattctgaatattatctttggcctgaaatac    |
| MurJ_D378N_R                  | gtatttcaggccaaagataatattcagaatgatattgctcaggctaa    |
| MurJ_N374L_F                  | cgcgaccattgtagcctgagcctaatacattctggatattatctttgg   |
| MurJ_N374L_R                  | ccaaagataatccagaatgattaggctcaggctaacaatggctcgcg    |
| MurJ_T394A_F                  | gttgcgctggcggccagcattgcgg                          |
| MurJ_T394A_R                  | ccgcaatgctggccgcccagcgcgaac                        |
| MurJ_T394C_F                  | cgttgcgctggcgtgcagcattgcgggc                       |
| MurJ_T394C_R                  | gcccgcaatgctgcacgcccagcgcgaacg                     |
| MurJ_T394V_F                  | cgttgcgctggcggtcagcattgcgggc                       |
| MurJ_T394V_R                  | gcccgcaatgctgaccgcccagcgcgaacg                     |
| <b>Other mutagenesis</b>      |                                                    |
| MurJ_D25A_F                   | cctgggtctgttctgctgtactgttcgcaaaat                  |
| MurJ_D25A_R                   | atthtgcgaacagtagacagcagcaaacagaccagg               |
| MurJ_D25N_F                   | gtatcctgggtctgttctgtaatgtactgttcgcaaaatac          |
| MurJ_D25N_R                   | gtattttgcgaacagtagcattacgaacagaccaggatac           |
| MurJ_R352A_F                  | gcatctatagcaccattagcgtatgctatcatgccatcaaaa         |
| MurJ_R352A_R                  | ttttgatggcatgatagctagcgttaattggtgctatagatgc        |
| MurJ_R352Q_F                  | ggcatctatagcaccattagccagagctatcatgccatcaaaaata     |
| MurJ_R352Q_R                  | tattttgatggcatgatagctctggctaattggtgctatagatgcc     |
| <b>Cysteine accessibility</b> |                                                    |
| MurJ_A29C_F                   | gtctgtttcgtgatgtactgttctgtaaatacttcggtgtctcttacga  |
| MurJ_A29C_R                   | tcgtaagagacaccgaagtatttacagaacagtagacacacgaacagac  |
| MurJ_I247C_F                  | ctttctacgacaaaggttctgctcttatctgcaatacgcgt          |
| MurJ_I247C_R                  | acgcgtattgcagataagagcaggaacctttgctgtagaaag         |
| MurJ_S113C_F                  | cctgttcggtgctggtgttctcatgaaactaag                  |
| MurJ_S113C_R                  | cttagttcatgagaacaaccagcaccgaacagg                  |
| MurJ_S61C_F                   | cggtaggggtgcaatgtgttctgcattgtacctc                 |
| MurJ_S61C_R                   | gaggtacaatgcagaacacattgcaccctcaccg                 |
| MurJ_S69C_F                   | ctgcattgtacctctgtactgtgaaaaatccggtg                |
| MurJ_S69C_R                   | caccggattttcacagtagaggtacaaatgcag                  |
| MurJ_S161C_F                  | ggctctgactccgtctatctgtaacattaccatcattattg          |
| MurJ_S161C_R                  | caataatgatggtaattgttacagatagacggagtcagagcc         |

|              |                                             |
|--------------|---------------------------------------------|
| MurJ_S240C_F | gtggacatgaacgtggtttgtttctacgacaaaggttc      |
| MurJ_S240C_R | gaacctttgtcgtagaacaaaccacgttcatgtccac       |
| MurJ_S248C_F | cgacaaaggttccatctgttatctgcaatacgcgt         |
| MurJ_S248C_R | acgcgtattgcagataacagatggaacctttgtcg         |
| MurJ_S254C_F | tcttatctgcaatacgcgtgccgtttctacctgc          |
| MurJ_S254C_R | gcaggtagaacggcacgcgtattgcagataaga           |
| MurJ_S274C_F | tatccactgttctgtgcaaatctccaacgatcg           |
| MurJ_S274C_R | cgatcgtggagattttgcacagaacaacagtgata         |
| MurJ_S277C_F | ctgtgttctgtccaaaatctgcaacgatcgtaaaaactcaa   |
| MurJ_S277C_R | ttgaagttttacgatcgttgcagattttggacagaacaacag  |
| MurJ_T232C_F | tggtcagccagatcaactgtgtgggtggacatgaacg       |
| MurJ_T232C_R | cgttcatgtccaccacacagttgatctggctgacca        |
| MurJ_T270C_F | ctgtttgctgtatccgtatcctgtgttctgtccaaaatctc   |
| MurJ_T270C_R | gagattttggacagaacaacacaggatcggatacagcaaacag |
| MurJ_V34C_F  | gttcgcaaaatactcggttgctcttacgagctggatgca     |
| MurJ_V34C_R  | tgcattccagctcgttaagagcaaccgaagtattttgcgaac  |
